# Supplementary material for: Genomic Analysis of Endophytic Bacillus cereus T4S and Its Plant Growth-Promoting Traits
Source: MDPI journal article supplement (doi:10.3390/plants10091776), 2021-08-26
Supplement: s1 [file s1]

# Genomic Analysis of Endophytic *Bacillus cereus* T4S and Its Plant Growth-promoting Traits

Bartholomew Saanu Adeleke <sup>1</sup>, Ayansina Segun Ayangbenro <sup>1</sup> and Olubukola Oluranti Babalola <sup>1\*</sup>

<sup>1</sup> Food Security and Safety Niche Area, Faculty of Natural and Agricultural Sciences, North-West University, Private Bag X2046, Mmabatho 2735, South Africa

\* Correspondence: olubukola.babalola@nwu.ac.za; Tel.: +27-(0)183892568

**Table S1.** Biochemical, cultural characterization of *B. cereus* T4S.

| Characteristics                      | Result |
|--------------------------------------|--------|
| Gram reaction                        | +      |
| Shape                                | rod    |
| Catalase                             | +      |
| Starch hydrolysis                    | +      |
| Nitrate                              | +      |
| Oxidase                              | +      |
| Citrate                              | +      |
| Casein hydrolysis                    | +      |
| Salt tolerance (% <i>v/v</i> ) (max) | 5.5    |
| Temperature range (°C)               | 25–45  |
| pH                                   | 4–10   |
| Fructose                             | +      |
| Galactose                            | +      |
| Sucrose                              | +      |
| Glucose                              | +      |
| Xylose                               | +      |
| Raffinose                            | +      |
| Mannitol                             | +      |
| Maltose                              | +      |

Key: + = positive reaction.

**Table S2.** Genes involved in protein secretion systems.

| Pathway                                  | Gene             | Product                                           | Locus Tag                   |
|------------------------------------------|------------------|---------------------------------------------------|-----------------------------|
| Sec (secretion) system                   | <i>secA</i>      | preprotein translocase subunit <i>SecA</i>        | HWX41_RS21805               |
|                                          | <i>secE/G/Y</i>  | preprotein translocase subunit<br><i>SecE/G/Y</i> | HWX41_RS26260               |
|                                          | <i>secE/G/Y</i>  | preprotein translocase subunit<br><i>SecE/G/Y</i> | HWX41_RS22075               |
|                                          | <i>secE/G/Y</i>  | preprotein translocase subunit<br><i>SecE/G/Y</i> | HWX41_RS26435/HWX41_RS11560 |
| Twin-arginine translocation (Tat) system | <i>yajC</i>      | preprotein translocase subunit <i>YajC</i>        | HWX41_RS02190               |
|                                          | <i>tatE/tatA</i> | protein translocase protein <i>TatE/TatA</i>      | HWX41_RS13235               |
|                                          | <i>tatC</i>      | protein translocase protein <i>TatC</i>           | HWX41_RS13230               |
|                                          | <i>tatC</i>      | twin-arginine translocase subunit<br><i>TatC</i>  | HWX41_RS13230               |

**Table S3.** Genes involved in sulfur metabolism.

| Pathway           | Gene        | Product                                              | Locus Tag                   |
|-------------------|-------------|------------------------------------------------------|-----------------------------|
| Sulfate transport | <i>cysC</i> | adenylyl-sulfate kinase                              | HWX41_RS16845               |
|                   | <i>sat</i>  | sulfate adenylyltransferase                          | HWX41_RS16850               |
|                   | <i>cysT</i> | sulfate transport system permease protein            | HWX41_RS18405               |
|                   | <i>cys</i>  | sulfate transport system substrate-binding protein   | HWX41_RS18410/HWX41_RS21870 |
|                   | <i>cysW</i> | sulfate ABC transporter permease subunit <i>CysW</i> | HWX41_RS18400               |
|                   | <i>cysK</i> | cysteine synthase A                                  | HWX41_RS15030/HWX41_RS26760 |
|                   | <i>cysS</i> | cysteine--tRNA ligase                                | HWX41_RS26230               |
|                   | <i>sulP</i> | sulfate permease                                     | HWX41_RS25435               |

**Table S4.** Genes involved in motility, biofilm formation, and chemotaxis.

| Pathway               | Gene        | Product                                                         | Locus tag                   |
|-----------------------|-------------|-----------------------------------------------------------------|-----------------------------|
| Chemotaxis            | <i>cheV</i> | chemotaxis protein <i>CheV</i>                                  | HWX41_RS15615               |
|                       | <i>che</i>  | chemotaxis protein                                              | HWX41_RS23355               |
|                       | <i>cheW</i> | purine-binding chemotaxis protein <i>CheW</i>                   | HWX41_RS15745               |
|                       | <i>che</i>  | methyl-accepting chemotaxis protein                             | HWX41_RS07060/HWX41_RS2445  |
| Flagella biosynthesis | <i>flgD</i> | flagellar basal body rod modification protein <i>FlgD</i>       | HWX41_RS15635               |
|                       | <i>fliK</i> | flagellar hook-length control protein <i>FliK</i>               | HWX41_RS15640               |
|                       | <i>flhB</i> | flagellar type III secretion system protein <i>FlhB</i>         | HWX41_RS15485               |
|                       | <i>flgB</i> | flagellar basal body rod protein <i>FlgB</i>                    | HWX41_RS15680               |
|                       | <i>flhA</i> | flagellar biosynthesis protein <i>FlhA</i>                      | HWX41_RS15480               |
|                       | <i>flgE</i> | flagellar hook protein <i>FlgE</i>                              | HWX41_RS15630               |
|                       | <i>fliL</i> | flagellar protein export ATPase <i>FliI</i>                     | HWX41_RS15650               |
|                       | <i>flgG</i> | flagellar basal-body rod protein                                | HWX41_RS15470               |
|                       | <i>flg</i>  | flagellar motor switch protein                                  | HWX41_RS15660               |
|                       | <i>flgG</i> | flagellar biosynthesis protein <i>FlgG</i>                      | HWX41_RS15685               |
|                       | <i>flhF</i> | flagellar biosynthesis protein <i>FlhF</i>                      | HWX41_RS15475               |
|                       | <i>fliR</i> | flagellar type III secretion system protein <i>FliR</i>         | HWX41_RS15490               |
|                       | <i>fliF</i> | flagellar M-ring protein <i>FliF</i>                            | HWX41_RS15665               |
|                       | <i>fliH</i> | flagellar assembly protein H                                    | HWX41_RS15655               |
|                       | <i>fliQ</i> | flagellar biosynthetic protein <i>FliQ</i>                      | HWX41_RS15495               |
|                       | <i>fliS</i> | flagellar protein <i>FliS</i>                                   | HWX41_RS15690               |
|                       | <i>flp</i>  | flagellar type III secretion system pore protein<br><i>FliP</i> | HWX41_RS15500               |
|                       | <i>fliN</i> | flagellar motor switch protein <i>FliN</i>                      | HWX41_RS15510/HWX41_RS15520 |
|                       | <i>fliC</i> | flagellar basal body rod protein <i>FlgC</i>                    | HWX41_RS15675/HWX41_RS16785 |
|                       | <i>fliY</i> | flagellar motor switch phosphatase <i>FliY</i>                  | HWX41_RS15740               |
|                       | <i>fliE</i> | flagellar hook-basal body complex protein <i>FliE</i>           | HWX41_RS15670               |

|                                 |             |                                                                            |                             |
|---------------------------------|-------------|----------------------------------------------------------------------------|-----------------------------|
|                                 | <i>motA</i> | flagellar motor stator protein <i>MotA</i> /Chemotaxis protein <i>MotA</i> | HWX41_RS01775               |
|                                 | <i>flgK</i> | flagellar hook-associated protein <i>FlgK</i>                              | HWX41_RS15705               |
|                                 | <i>fliM</i> | flagellar motor switch protein <i>FliM</i>                                 | HWX41_RS15515               |
|                                 | <i>motB</i> | flagellar motor protein <i>MotB</i> /Chemotaxis protein <i>MotB</i>        | HWX41_RS01780/HWX41_RS04225 |
|                                 | ND          | flagellar hook-associated protein 2 / protein 3                            | HWX41_RS15695               |
|                                 | ND          | flagellin                                                                  | HWX41_RS15700               |
|                                 | ND          | flagellin                                                                  | HWX41_RS15530               |
|                                 |             |                                                                            | HWX41_RS15535               |
| Pilus and fimbriae biosynthesis | ND          | isopeptide-forming domain-containing fimbrial protein                      | HWX41_RS27290               |
| Biofilm formation               | <i>efp</i>  | elongation factor P                                                        | HWX41_RS03245               |
|                                 | <i>hfq</i>  | RNA chaperone <i>Hfq</i>                                                   | HWX41_RS05840/HWX41_RS15770 |
|                                 | <i>crp</i>  | <i>Crp/Fnr</i> family transcriptional regulator                            | HWX41_RS16660               |

Key: ND—not determined.

**Table S5.** Genes involved in attachment to plant surfaces.

| Pathway                                     | Gene        | Product                                                                                            | Locus tag                   |
|---------------------------------------------|-------------|----------------------------------------------------------------------------------------------------|-----------------------------|
| LPS, Lipid A biosynthesis and modifications | <i>murF</i> | UDP-N-acetylmuramoyl-tripeptide--D-alanyl-D-alanine ligase                                         | HWX41_RS25735               |
|                                             | <i>murA</i> | UDP-N-acetylglucosamine 1-carboxyvinyltransferase                                                  | HWX41_RS21065/HWX41_RS21305 |
|                                             | <i>murB</i> | UDP-N-acetylmuramate dehydrogenase                                                                 | HWX41_RS04775               |
|                                             | <i>murC</i> | UDP-N-acetylmuramate--L-alanine ligase                                                             | HWX41_RS00935               |
|                                             | <i>murE</i> | UDP-N-acetylmuramoyl-L-alanyl-D-glutamate--2,6-diaminopimelate ligase                              | HWX41_RS04750               |
|                                             | <i>murD</i> | UDP-N-acetylmuramoyl-L-alanine--D-glutamate ligase                                                 | HWX41_RS04760               |
|                                             | <i>murG</i> | undecaprenyldiphospho-muramoylpentapeptide beta-N-acetylglucosaminyltransferase                    | HWX41_RS04770               |
|                                             | <i>galE</i> | UDP-glucose 4-epimerase <i>GalE</i>                                                                | HWX41_RS21410               |
|                                             | <i>wecB</i> | UDP-N-acetylglucosamine 2-epimerase (non-hydrolyzing)                                              | HWX41_RS21750               |
|                                             | ND          | UDP-N-acetylmuramate dehydrogenase                                                                 | HWX41_RS22310               |
|                                             | ND          | UDP-glucosyltransferase                                                                            | HWX41_RS11130               |
|                                             | ND          | UDP-galactose-lipid carrier transferase                                                            | HWX41_RS15090               |
|                                             | ND          | UDP-glucose/GDP-mannose dehydrogenase family protein                                               | HWX41_RS25510               |
|                                             | <i>glmU</i> | bifunctional UDP-N-acetylglucosamine diphosphorylase                                               | HWX41_RS26655               |
|                                             | <i>glmU</i> | glucosamine-1-phosphate N-acetyltransferase <i>GlmU</i>                                            | HWX41_RS26655               |
|                                             | <i>uppP</i> | bacitracin resistance undecaprenyl-diphosphatase, undecaprenyl-diphosphate phosphatase <i>UppP</i> | HWX41_RS17035               |
|                                             |             |                                                                                                    | HWX41_RS27450               |
| LPS, O-antigen biosynthesis                 | <i>rfbD</i> | dTDP-4-dehydrorhamnose reductase                                                                   | HWX41_RS17900               |
|                                             | <i>rfbB</i> | dTDP-glucose 4,6-dehydratase                                                                       | HWX41_RS17905               |
|                                             | <i>rfbC</i> | dTDP-4-dehydrorhamnose 3,5-epimerase                                                               | HWX41_RS17910               |

Key: ND— not determined.

**Table S6.** Genes involved in the protection against oxidative and nitrosative stress.

| Pathway                                                     | Gene        | Product                                         | Locus tag                   |
|-------------------------------------------------------------|-------------|-------------------------------------------------|-----------------------------|
| Degradation of superoxide anion radicals                    | <i>sodA</i> | superoxide dismutase                            | HWX41_RS20530/HWX41_RS02855 |
|                                                             | <i>sodA</i> | superoxide dismutase family protein             | HWX41_RS23120               |
|                                                             | <i>sodA</i> | superoxide dismutase                            | HWX41_RS16575               |
| Degradation of hydrogen peroxide                            | <i>katB</i> | catalase                                        | HWX41_RS18175               |
|                                                             | ND          | manganese catalase family protein               | HWX41_RS19840               |
|                                                             | <i>kat</i>  | catalase                                        | HWX41_RS07625/HWX41_RS09520 |
| Degradation of hydrogen peroxide and organic hydroperoxides | <i>tpx</i>  | Thiol peroxidase                                | HWX41_RS01185               |
|                                                             | <i>bcp</i>  | thioredoxin-dependent thiol peroxidase          | HWX41_RS25065               |
|                                                             | <i>osmC</i> | <i>OsmC</i> family protein (peroxiredoxin osmc) | HWX41_RS23535               |
|                                                             | <i>ahpC</i> | Peroxiredoxin                                   | HWX41_RS24440               |
|                                                             | <i>ahpF</i> | Alkyl hydroperoxide reductase subunit F         | HWX41_RS24435               |
|                                                             | ND          | alkylphosphonate utilization protein            | HWX41_RS25420               |
|                                                             | ND          | organic hydroperoxide resistance protein        | HWX41_RS01930               |
| Detoxification of peroxidized compounds                     | <i>bsaA</i> | glutathione peroxidase                          | HWX41_RS13745               |
|                                                             | <i>grx</i>  | glutaredoxin family protein                     | HWX41_RS22030/HWX41_RS04375 |
|                                                             | <i>grx</i>  | glutaredoxin family protein                     | HWX41_RS19015               |
| NOS resistance                                              | ND          | nitric oxide synthase oxygenase                 | HWX41_RS20535               |
| Hydroxylamine reduction                                     | <i>hcp</i>  | hydroxylamine reductase                         | HWX41_RS06975               |
| ROS resistance                                              | ND          | PQQ-dependent sugar dehydrogenase               | HWX41_RS11455               |

Key: ND—not determined.

**Table S7.** Genes involved in carbohydrate metabolism.

| Pathway                                     | Gene        | Product                                                                      | Locus tag                   |
|---------------------------------------------|-------------|------------------------------------------------------------------------------|-----------------------------|
| Pentose phosphate                           | <i>tkt</i>  | transketolase                                                                | HWX41_RS05950               |
| EMP                                         | <i>glcK</i> | glucokinase                                                                  | HWX41_RS02915               |
| Glycolysis                                  | <i>glcU</i> | glucose uptake protein <i>GlcU</i>                                           | HWX41_RS00785               |
|                                             | <i>ND</i>   | glucose-6-phosphate isomerase                                                | HWX41_RS23165               |
|                                             | <i>ND</i>   | glucose 1-dehydrogenase                                                      | HWX41_RS19280/HWX41_RS00790 |
|                                             | <i>ND</i>   | glucose-6-phosphate dehydrogenase                                            | HWX41_RS08270/HWX41_RS27525 |
|                                             | <i>pfkA</i> | 6-phosphofructokinase                                                        | HWX41_RS01390               |
|                                             | <i>pfkB</i> | 1-phosphofructokinase                                                        | HWX41_RS05815               |
|                                             | <i>ND</i>   | fructose-bisphosphate aldolase                                               | HWX41_RS21060               |
|                                             | <i>ND</i>   | glyceraldehyde-3-phosphate dehydrogenase                                     | HWX41_RS01470               |
|                                             | <i>gap</i>  | type I glyceraldehyde-3-phosphate dehydrogenase                              | HWX41_RS22040               |
|                                             | <i>gapN</i> | NADP-dependent glyceraldehyde-3-phosphate dehydrogenase                      | HWX41_RS19640               |
|                                             | <i>ND</i>   | phosphoglycerate kinase                                                      | HWX41_RS22045               |
|                                             | <i>gpmL</i> | 2,3-bisphosphoglycerate-dependent phosphoglycerate mutase                    | HWX41_RS22055               |
|                                             | <i>mtnW</i> | 2,3-diketo-5-methylthiopentyl-1-phosphate enolase                            | HWX41_RS04125               |
|                                             | <i>mtnA</i> | S-methyl-5-thioribose-1-phosphate isomerase                                  | HWX41_RS04145               |
|                                             | <i>pdhA</i> | pyruvate dehydrogenase E1 component subunit alpha                            | HWX41_RS04455               |
|                                             | <i>pdhB</i> | pyruvate dehydrogenase complex E1 component subunit beta                     | HWX41_RS04460               |
|                                             | <i>pdhC</i> | pyruvate dehydrogenase complex dihydrolipoyllysine-residue acetyltransferase | HWX41_RS04465               |
|                                             | <i>pyc</i>  | pyruvate carboxylase                                                         | HWX41_RS04585               |
|                                             | <i>ND</i>   | pyruvate kinase                                                              | HWX41_RS08535               |
| Maltose transport                           | <i>malC</i> | maltosaccharide ABC transporter permease <i>MalC</i>                         | HWX41_RS04255               |
|                                             | <i>malD</i> | maltosaccharide ABC transporter permease <i>MalD</i>                         | HWX41_RS04260               |
|                                             | <i>malR</i> | maltose operon transcriptional repressor <i>MalR</i>                         | HWX41_RS04265               |
| Glucose and glucose-1-phosphate degradation | <i>gntK</i> | gluconokinase                                                                | HWX41_RS08285               |



|                                                          |             |                                                              |                            |
|----------------------------------------------------------|-------------|--------------------------------------------------------------|----------------------------|
|                                                          | <i>glgC</i> | glucose-1-phosphate adenylyltransferase                      | HWX41_RS00075              |
|                                                          | <i>glgB</i> | 1,4-alpha-glucan branching protein <i>GlgB</i>               | HWX41_RS00070              |
|                                                          | <i>glgD</i> | glucose-1-phosphate adenylyltransferase subunit <i>GlgD</i>  | HWX41_RS00080              |
|                                                          | <i>glgA</i> | glycogen synthase <i>GlgA</i>                                | HWX41_RS00085              |
|                                                          | <i>glgP</i> | glycogen phosphorylase                                       | HWX41_RS00090              |
|                                                          | <i>glcU</i> | glucose uptake protein <i>GlcU</i>                           | HWX41_RS00785              |
|                                                          | <i>galU</i> | UTP--glucose-1-phosphate uridylyltransferase                 | HWX41_RS23065/HWX41_RS2550 |
|                                                          |             |                                                              | 5                          |
| Glucose transport                                        | <i>pstG</i> | PTS glucose transporter subunit IIAABC                       | HWX41_RS04055              |
|                                                          | <i>pstH</i> | phosphocarrier protein HPr                                   | HWX41_RS04060              |
| Fructose degradation                                     | <i>pfkA</i> | 6-phosphofructokinase                                        | HWX41_RS01390              |
|                                                          | <i>pfkB</i> | 1-phosphofructokinase                                        | HWX41_RS05815              |
|                                                          | <i>fsa</i>  | fructose-6-phosphate aldolase                                | HWX41_RS23420              |
| Ribose degradation                                       | <i>rbsK</i> | ribokinase                                                   | HWX41_RS23445              |
|                                                          | <i>doeC</i> | deoxyribose-phosphate aldolase                               | HWX41_RS14830              |
|                                                          | <i>rpiA</i> | ribose 5-phosphate isomerase A                               | HWX41_RS10690              |
|                                                          | <i>rpiB</i> | ribose 5-phosphate isomerase B                               | HWX41_RS21150              |
|                                                          | <i>rbsD</i> | D-ribose pyranase                                            | HWX41_RS23440              |
| Ribose transport                                         | <i>rbsB</i> | ribose ABC transporter substrate-binding protein <i>RbsB</i> | HWX41_RS23425              |
|                                                          | <i>rbsC</i> | ribose ABC transporter permease                              | HWX41_RS23430              |
|                                                          | <i>rbsA</i> | ribose ABC transporter ATP-binding protein <i>RbsA</i>       | HWX41_RS23435              |
|                                                          | <i>rbsR</i> | ribose operon transcriptional repressor <i>RbsR</i>          | HWX41_RS23450              |
| Hexose metabolism                                        | <i>ND</i>   | aldose 1-epimerase family protein                            | HWX41_RS15905              |
| GDP-mannose degradation                                  | <i>ppaX</i> | GDP-mannose pyrophosphatase <i>PpaX</i>                      | HWX41_RS21930              |
|                                                          | <i>deoB</i> | phosphopentomutase                                           | HWX41_RS03865              |
| Trehalose degradation                                    | <i>treC</i> | alpha, alpha-trehalase                                       | HWX41_RS23595              |
|                                                          | <i>treC</i> | alpha,alpha-trehalase                                        | HWX41_RS0424               |
| D-galactosamine and N-acetyl-D-galactosamine degradation | <i>nagA</i> | N-acetylglucosamine-6-phosphate deacetylase                  | HWX41_RS04030              |
|                                                          | <i>nagA</i> | N-acetylglucosamine-6-phosphate deacetylase                  | HWX41_RS04030              |
|                                                          | <i>nagB</i> | glucosamine-6-phosphate deaminase                            | HWX41_RS04035              |
|                                                          | <i>pfkA</i> | 6-phosphofructokinase                                        | HWX41_RS01390              |
| Myo-inositol degradation                                 | <i>ND</i>   | inositol-1-monophosphatase protein family                    | HWX41_RS04530              |
|                                                          | <i>iolE</i> | myo-inosose-2 dehydratase                                    | HWX41_RS07140              |
|                                                          | <i>iolG</i> | inositol 2-dehydrogenase                                     | HWX41_RS07120              |

|                                                                                      |             |                                                                           |                                 |
|--------------------------------------------------------------------------------------|-------------|---------------------------------------------------------------------------|---------------------------------|
|                                                                                      | <i>iolD</i> | 3D-(3,5/4)-trihydroxycyclohexane-1,2-dione<br>acylhydrolase (decyclizing) | HWX41_RS07135                   |
|                                                                                      | <i>iolC</i> | 5-dehydro-2-deoxygluconokinase                                            | HWX41_RS07125                   |
|                                                                                      | <i>ND</i>   | 5-deoxy-glucuronate isomerase                                             | HWX41_RS07155                   |
|                                                                                      | <i>ND</i>   | methylmalonate-semialdehyde dehydrogenase (CoA<br>acylating)              | HWX41_RS12755                   |
| D-gluconate degradation                                                              | <i>gntK</i> | gluconokinase                                                             | HWX41_RS19365/HWX41_RS0828<br>5 |
| D-gluconate transformation<br>to 2-keto D-gluconate (2-<br>KG)                       | <i>gntP</i> | gluconate permease <i>GntP</i>                                            | HWX41_RS19360                   |
|                                                                                      | <i>gntR</i> | gluconate operon transcriptional repressor <i>GntR</i>                    | HWX41_RS19370                   |
| 2KG to 6-phospho-D-<br>gluconate                                                     | <i>dhbA</i> | 2,3-dihydro-2,3-dihydroxybenzoate dehydrogenase                           | HWX41_RS12675                   |
|                                                                                      | <i>dhbC</i> | isochorismate synthase <i>DhbC</i>                                        | HWX41_RS12670                   |
| L-lactate degradation                                                                | <i>ND</i>   | L-lactate dehydrogenase                                                   | HWX41_RS22670                   |
|                                                                                      | <i>ND</i>   | L-lactate dehydrogenase                                                   | HWX41_RS00065                   |
|                                                                                      | <i>ND</i>   | L-lactate dehydrogenase                                                   | HWX41_RS14695                   |
| L-lyxose, 2,3-diketo-L-<br>gulonate, L-ascorbate<br>degradation                      | <i>ND</i>   | L-ribulose-5-phosphate 4-epimerase                                        | HWX41_RS05030                   |
| D-tagatose degradation                                                               | <i>nagA</i> | N-acetylglucosamine-6-phosphate deacetylase                               | HWX41_RS04030                   |
| Degradation of<br>Beta-Glucosides (e.g.<br>cellobiose, salicin, arbutin,<br>esculin) | <i>celF</i> | 6-phospho-beta-glucosidase                                                | HWX41_RS21710                   |
| Cellobiose transport                                                                 | <i>celB</i> | PTS cellobiose transporter subunit IIC                                    | HWX41_RS21665/HWX41_RS2170<br>0 |
|                                                                                      | <i>celF</i> | 6-phospho-beta-glucosidase                                                | HWX41_RS21710                   |
| Degradation of unknown<br>glucosides                                                 | <i>ND</i>   | glycosyl hydrolase                                                        | HWX41_RS15345/HWX41_RS2046<br>5 |
|                                                                                      | <i>ND</i>   | glycoside hydrolase/lysozyme                                              | HWX41_RS05625                   |
|                                                                                      | <i>ND</i>   | glycoside hydrolase/lysozyme                                              | HWX41_RS06965                   |
|                                                                                      | <i>ND</i>   | glycoside hydrolase/lysozyme                                              | HWX41_RS09710                   |
|                                                                                      | <i>ND</i>   | glycoside hydrolase/lysozyme                                              | HWX41_RS14465                   |

|                    |           |                                                                     |               |
|--------------------|-----------|---------------------------------------------------------------------|---------------|
| Chitin degradation | <i>ND</i> | chitobiase/beta-hexosaminidase C-terminal domain-containing protein | HWX41_RS18500 |
|--------------------|-----------|---------------------------------------------------------------------|---------------|

Key: ND—not determined.

**Table S8.** Genes involved in carbohydrate transport.

| Pathway                                            | Gene                     | Product                                              | Locus tag                                                   |
|----------------------------------------------------|--------------------------|------------------------------------------------------|-------------------------------------------------------------|
| Maltose/maltodextrin and multiple sugars transport | <i>malR</i>              | maltose operon transcriptional repressor <i>MalR</i> | HWX41_RS04265                                               |
| Trehalose-specific EIIBC component                 | <i>treP</i> <sup>1</sup> | PTS system, trehalose-specific EIIBC component       | HWX41_RS23600                                               |
|                                                    | <i>treC</i>              | alpha,alpha-phosphotrehalase                         | HWX41_RS23595                                               |
|                                                    | <i>treR</i>              | trehalose operon repressor                           | HWX41_RS23605                                               |
|                                                    | <i>bcr</i>               | <i>Bcr/CflA</i> family efflux MFS transporter        | HWX41_RS26020                                               |
|                                                    | ND                       | DHA2 family efflux MFS transporterpermease subunit   |                                                             |
|                                                    | ND                       | DHA2 family efflux MFS transporter permease subunit  | HWX41_RS01545/HWX41_RS04310<br>HWX41_RS09945/ HWX41_RS12645 |
|                                                    | ND                       | DHA2 family efflux MFS transporter permease subunit  | HWX41_RS12645/HWX41_RS15080                                 |
|                                                    | ND                       | peptide MFS transporter                              | HWX41_RS23330                                               |
|                                                    | ND                       | OFA family MFS transporter                           | HWX41_RS12690                                               |
| Sugar acids transport                              | <i>lldP</i>              | L-lactate permease                                   | HWX41_RS21585/HWX41_RS17765                                 |

Key: ND—not determined.

**Table S9.** Genes involved in the metabolism of organic acids

| Pathway               | Gene        | Product                                                                   | Locus Tag                   |
|-----------------------|-------------|---------------------------------------------------------------------------|-----------------------------|
| TCA cycle             | <i>aceA</i> | isocitrate lyase                                                          | HWX41_RS18305               |
|                       | <i>prpB</i> | methylosuccinate lyase                                                    | HWX41_RS12770               |
|                       | <i>aceB</i> | malate synthase A                                                         | HWX41_RS18310               |
|                       | <i>icd</i>  | NADP-dependent isocitrate dehydrogenase                                   | HWX41_RS01420               |
|                       | <i>odhA</i> | 2-oxoglutarate dehydrogenase E1 component                                 | HWX41_RS17695               |
|                       | <i>odhB</i> | 2-oxoglutarate dehydrogenase complex                                      | HWX41_RS17700               |
|                       |             | dihydrolipoyllysine-residue succinyltransferase                           |                             |
|                       | <i>gabT</i> | 4-aminobutyrate--2-oxoglutarate transaminase                              | HWX41_RS19330/HWX41_RS24350 |
|                       |             | adenylosuccinate synthase                                                 | HWX41_RS20390               |
|                       | <i>purB</i> | adenylosuccinate lyase                                                    | HWX41_RS24180               |
|                       | <i>argG</i> | argininosuccinate synthase                                                | HWX41_RS01225/HWX41_RS06510 |
|                       | <i>argH</i> | argininosuccinate lyase                                                   | HWX41_RS01230               |
|                       | <i>sdhC</i> | succinate dehydrogenase cytochrome B558                                   | HWX41_RS01750               |
|                       | <i>sdhA</i> | succinate dehydrogenase flavoprotein subunit                              | HWX41_RS01755               |
|                       | <i>ND</i>   | succinate CoA transferase                                                 | HWX41_RS07255               |
|                       | <i>sdhB</i> | succinate dehydrogenase iron-sulfur subunit                               | HWX41_RS01760               |
|                       | <i>fumA</i> | fumarate hydratase class I                                                | HWX41_RS24845               |
|                       | <i>fumC</i> | fumarate hydratase class II                                               | HWX41_RS15315               |
|                       | <i>mdh</i>  | malate dehydrogenase                                                      | HWX41_RS01425               |
|                       | <i>citZ</i> | citrate synthase                                                          | HWX41_RS01415               |
|                       | <i>mmgD</i> | citrate synthase                                                          | HWX41_RS12780               |
|                       | <i>mend</i> | 2-succinyl-5-enolpyruvyl-6-hydroxy-3-cyclohexene-carboxylic-acid synthase | HWX41_RS00135               |
|                       | <i>menH</i> | 2-succinyl-6-hydroxy-2,4-cyclohexadiene-1-carboxylate synthase            | HWX41_RS00140               |
|                       | <i>menB</i> | 1,4-dihydroxy-2-naphthoyl-CoA synthase                                    | HWX41_RS00145               |
|                       | <i>menC</i> | o-succinylbenzoate synthase                                               | HWX41_RS00155               |
| Glyoxylate bypass TCA | <i>acnA</i> | aconitate hydratase                                                       | HWX41_RS06265               |
|                       | <i>aceA</i> | isocitrate lyase                                                          | HWX41_RS18305               |
|                       | <i>aceB</i> | malate synthase                                                           | HWX41_RS18310               |
| Formate degradation   | <i>fdhD</i> | formate dehydrogenase accessory sulfurtransferase<br><i>FdhD</i>          | HWX41_RS15580/HWX41_RS23795 |
|                       | <i>fdhF</i> | formate dehydrogenase subunit alpha                                       | HWX41_RS15595/HWX41_RS23790 |

Key: ND—not determined.

**Table S10.** Genes involved in amino acid metabolism and transport

| Pathway                            | Gene        | Product                                      | Locus Tag                   |
|------------------------------------|-------------|----------------------------------------------|-----------------------------|
| Methionine degradation             | <i>metK</i> | methionine adenosyltransferase               | HWX41_RS00560               |
| D-alanine degradation              | <i>alr</i>  | alanine racemase                             | HWX41_RS13960/HWX41_RS25705 |
|                                    | <i>ald</i>  | alanine dehydrogenase                        | HWX41_RS07920               |
|                                    | <i>ald</i>  | alanine dehydrogenase                        | HWX41_RS01270               |
|                                    | <i>ald</i>  | alanine dehydrogenase                        | HWX41_RS13960               |
|                                    | <i>ald</i>  | alanine dehydrogenase                        | HWX41_RS23775               |
|                                    | <i>ald</i>  | alanine dehydrogenase                        | HWX41_RS25230               |
| L-arginine degradation             | <i>speA</i> | arginine decarboxylase                       | HWX41_RS04510               |
|                                    | <i>lysA</i> | diaminopimelate decarboxylase                | HWX41_RS16865               |
| L-aspartate degradation/conversion | <i>aspB</i> | aspartate aminotransferase <i>AspB</i>       | HWX41_RS16185               |
|                                    | <i>aspA</i> | Aspartate ammonia-lyase                      | HWX41_RS15170/HWX41_RS23690 |
|                                    | <i>panD</i> | Aspartate 1-decarboxylase                    | HWX41_RS16205               |
|                                    | <i>nadB</i> | L-aspartate oxidase                          | HWX41_RS02115               |
|                                    | <i>pryB</i> | aspartate carbamoyltransferase               | HWX41_RS04875               |
|                                    | <i>dapG</i> | Aspartate kinase                             | HWX41_RS05435/HWX41_RS15135 |
|                                    | <i>aspS</i> | aspartate--tRNA(Asn) ligase                  | HWX41_RS13465               |
|                                    |             |                                              |                             |
| L-cysteine degradation             | <i>cysK</i> | cysteine synthase A                          | HWX41_RS26760/HWX41_RS15035 |
|                                    | <i>ND</i>   | cysteine hydrolase                           | HWX41_RS26930               |
|                                    | <i>ND</i>   | cysteine hydrolase                           | HWX41_RS02940               |
|                                    | <i>ND</i>   | cysteine hydrolase                           | HWX41_RS09875               |
| Cysteine transformation            | <i>sufS</i> | cysteine desulfurase                         | HWX41_RS01140/HWX41_RS22740 |
|                                    | <i>iscS</i> | <i>IscS</i> subfamily cysteine desulfurase   | HWX41_RS02110/HWX41_RS02290 |
| D-cysteine degradation             | <i>ND</i>   | D-cysteine desulfhydrase                     | HWX41_RS08870               |
| L-glutamate degradation            | <i>gudB</i> | NAD-specific glutamate dehydrogenase         | HWX41_RS16465               |
|                                    | <i>pruA</i> | L-glutamate gamma-semialdehyde dehydrogenase | HWX41_RS24270               |
| L-glutamine degradation            | <i>ND</i>   | glutamate synthase                           | HWX41_RS25035               |

|                                     | <i>racE</i>  | glutamate racemase                                                                                              | HWX41_RS01860/HWX41_RS1964<br>5 |
|-------------------------------------|--------------|-----------------------------------------------------------------------------------------------------------------|---------------------------------|
| L-histidine degradation             | <i>hutH</i>  | histidine ammonia-lyase                                                                                         | HWX41_RS06090                   |
|                                     | <i>hutU</i>  | urocanate hydratase                                                                                             | HWX41_RS06095                   |
|                                     | <i>hutI</i>  | Imidazolonepropionase                                                                                           | HWX41_RS06100                   |
|                                     | <i>hutG</i>  | Formiminoglutamase                                                                                              | HWX41_RS06105                   |
|                                     | <i>hutP</i>  | hut operon transcriptional regulator <i>HutP</i>                                                                | HWX41_RS06085                   |
|                                     | <i>resE</i>  | sensor histidine kinase <i>ResE</i>                                                                             | HWX41_RS16530                   |
|                                     | <i>resC</i>  | cytochrome c biogenesis protein <i>ResC</i>                                                                     | HWX41_RS16540                   |
|                                     | <i>resB</i>  | cytochrome c biogenesis protein <i>ResB</i>                                                                     | HWX41_RS16545                   |
|                                     | <i>resA</i>  | thiol-disulfide oxidoreductase <i>ResA</i>                                                                      | HWX41_RS16550                   |
|                                     | <i>dcuS</i>  | two-component system sensor histidine kinase<br><i>DcuS</i>                                                     | HWX41_RS23850                   |
| L-proline degradation               | <i>ND</i>    | proline dehydrogenase                                                                                           | HWX41_RS22610                   |
|                                     | <i>proS</i>  | proline--tRNA ligase                                                                                            | HWX41_RS24700                   |
| L-tyrosine degradation              | <i>hppD</i>  | 4-hydroxyphenylpyruvate dioxygenase                                                                             | HWX41_RS25765                   |
|                                     | <i>xerS</i>  | tyrosine recombinase <i>XerS</i>                                                                                | HWX41_RS25285                   |
| Glycine cleavage                    | <i>thiO</i>  | glycine oxidase <i>ThiO</i>                                                                                     | HWX41_RS20150                   |
|                                     | <i>gcvH</i>  | glycine cleavage system protein <i>GcvH</i>                                                                     | HWX41_RS22695                   |
|                                     | <i>gcvT</i>  | glycine cleavage system aminomethyltransferase<br><i>GcvT</i>                                                   | HWX41_RS03090                   |
|                                     | <i>gcvPA</i> | aminomethyl-transferring glycine dehydrogenase<br>subunit 1                                                     | HWX41_RS03095                   |
|                                     | <i>gcvPB</i> | aminomethyl-transferring glycine dehydrogenase<br>subunit 2                                                     | HWX41_RS03100                   |
|                                     |              |                                                                                                                 |                                 |
| Branched-chain amino acid transport | <i>asn</i>   | asparagine synthase (glutamine-hydrolyzing)<br>branched-chain amino acid transport system II<br>carrier protein | HWX41_RS13200                   |
|                                     | <i>brnQ</i>  | branched-chain amino acid transport system II<br>carrier protein                                                | HWX41_RS01645                   |
|                                     | <i>brnQ</i>  | branched-chain amino acid transport system II<br>carrier protein                                                | HWX41_RS14100                   |
|                                     | <i>brnQ</i>  | branched-chain amino acid transport system II<br>carrier protein                                                | HWX41_RS14750                   |
|                                     | <i>brnQ</i>  | branched-chain amino acid transport system II<br>carrier protein                                                | HWX41_RS16755                   |
|                                     | <i>brnQ</i>  | branched-chain amino acid transport system II<br>carrier protein                                                | HWX41_RS19845                   |
|                                     | <i>brnQ</i>  | branched-chain amino acid transport system II<br>carrier protein                                                | HWX41_RS23325                   |
|                                     | <i>brnQ</i>  | branched-chain amino acid transport system II<br>carrier protein                                                | HWX41_RS14100                   |
|                                     |              |                                                                                                                 |                                 |



branched-chain amino acid transport system II  
carrier protein  
branched-chain amino acid transport system II  
carrier protein

*dat*

D-amino-acid transaminase

HWX41\_RS13175

---

Key: ND—not determine.

**Table S11.** Genes involved in opine and GABA transport and metabolism.

| Pathway                                            | Gene        | Product                                                                     | Locus Tag                   |
|----------------------------------------------------|-------------|-----------------------------------------------------------------------------|-----------------------------|
| Myo-inositol, Rhizopine metabolism                 | <i>iolE</i> | myo-inosose-2 dehydratase                                                   | HWX41_RS07140               |
|                                                    | <i>iolG</i> | myo-inositol 2-dehydrogenase                                                | HWX41_RS07120               |
|                                                    | <i>iolD</i> | 3D-(3,5/4)-trihydroxycyclohexane-1,2-dione acylhydrolase (decyclizing)      | HWX41_RS07135               |
|                                                    | <i>iolC</i> | 5-dehydro-2-deoxygluconokinase                                              | HWX41_RS07125               |
|                                                    | <i>ND</i>   | 5-deoxy-glucuronate isomerase                                               | HWX41_RS07155               |
| Putrescine and spermidine production and transport | <i>speB</i> | agmatinase                                                                  | HWX41_RS07085/HWX41_RS20910 |
|                                                    | <i>speE</i> | spermidine synthase                                                         | HWX41_RS20905               |
|                                                    | <i>ND</i>   | glutathionylspermidine synthase family protein                              | HWX41_RS10015/HWX41_RS16005 |
|                                                    | <i>potD</i> | spermidine/putrescine ABC transporter substrate-binding protein <i>PotD</i> | HWX41_RS17570               |
|                                                    | <i>potC</i> | spermidine/putrescine ABC transporter permease <i>PotC</i>                  | HWX41_RS17575               |
|                                                    | <i>potB</i> | spermidine/putrescine ABC transporter permease <i>PotB</i>                  | HWX41_RS17580               |
|                                                    | <i>potA</i> | spermidine/putrescine ABC transporter ATP-binding protein <i>PotA</i>       | HWX41_RS17585               |
| GABA biosynthesis                                  | <i>ND</i>   | gamma-glutamyl-gamma-aminobutyrate hydrolase family protein                 | HWX41_RS17805/HWX41_RS07225 |

Key: ND—not determined.

**Table S12.** Genes involved in lignin degradation and degradation against toxic peroxides.

| Pathway                              | Gene        | Product                                            | Locus Tag                   |
|--------------------------------------|-------------|----------------------------------------------------|-----------------------------|
| Lignin degradation                   | ND          | multicopper oxidase domain-containing protein      | HWX41_RS14790               |
| Degradation of toxic peroxides       | ND          | Superoxide dismutase                               | HWX41_RS16575               |
|                                      | <i>sodA</i> | Superoxide dismutase                               | HWX41_RS20530/HWX41_RS02855 |
|                                      | <i>sodA</i> | superoxide dismutase family protein                | HWX41_RS23120               |
|                                      | <i>ahpC</i> | Peroxiredoxin                                      | HWX41_RS24440               |
|                                      | <i>katB</i> | Catalase                                           | HWX41_RS07625/HWX41_RS09520 |
|                                      | <i>katB</i> | Catalase                                           | HWX41_RS18175               |
|                                      | <i>bcp</i>  | thioredoxin-dependent thiol peroxidase             | HWX41_RS25065               |
|                                      | <i>tpx</i>  | thiol peroxidase                                   | HWX41_RS01185               |
|                                      | <i>ahpC</i> | Peroxiredoxin                                      | HWX41_RS24440               |
| Metabolism of alcohols and aldehydes | ND          | organic hydroperoxide resistance protein           | HWX41_RS01930               |
|                                      | <i>adhP</i> | alcohol dehydrogenase <i>AdhP</i>                  | HWX41_RS13135               |
|                                      | <i>adhP</i> | alcohol dehydrogenase <i>AdhP</i>                  | HWX41_RS13135               |
|                                      | ND          | zinc-binding alcohol dehydrogenase family protein  | HWX41_RS06915               |
|                                      | ND          | iron-containing alcohol dehydrogenase              | HWX41_RS05805/HWX41_RS13340 |
|                                      | <i>adhE</i> | bifunctional acetaldehyde-CoA/alcoholdehydrogenase | HWX41_RS02425               |

Key: ND—not determine.

**Table S13.** Genes involved in biological control.

| Pathway              | Gene        | Product                                                           | Locus Tag     |
|----------------------|-------------|-------------------------------------------------------------------|---------------|
| Volatile degradation | <i>acoA</i> | acetoin:2,6-dichlorophenolindophenol oxidoreductase subunit alpha | HWX41_RS10755 |
|                      | <i>acoB</i> | acetoin:2,6-dichlorophenolindophenol oxidoreductase subunit beta  | HWX41_RS10760 |
| 2,3-Butanediol       | <i>ilvA</i> | threonine ammonia-lyase <i>ilvA</i>                               | HWX41_RS14970 |
|                      | <i>ilvD</i> | dihydroxy-acid dehydratase                                        | HWX41_RS14975 |
|                      | <i>ilvC</i> | ketol-acid reductoisomerase                                       | HWX41_RS16965 |
|                      | <i>ilvN</i> | acetolactate synthase small subunit                               | HWX41_RS16970 |
|                      | <i>ilvB</i> | acetolactate synthase large subunit                               | HWX41_RS16975 |
|                      | <i>ilvE</i> | branched-chain-amino-acid transaminase                            | HWX41_RS16980 |
| Isoprene             | <i>ispG</i> | 4-hydroxy-3-methylbut-2-enyl-diphosphate synthase                 | HWX41_RS02835 |
| Colonization         | <i>minD</i> | septum site-determining protein <i>MinD</i>                       | HWX41_RS02025 |

**Table S14.** Physical and chemical analysis of the soil samples.

| Parameter             | Result Output |
|-----------------------|---------------|
| Manganese (mg/kg)     | 43.57         |
| Phosphorus (mg/kg)    | 74.93         |
| Organic carbon (%)    | 1.19          |
| Total nitrogen (%)    | 0.10          |
| pH (H <sub>2</sub> O) | 7.40          |
| Magnesium (mg/kg)     | 642.00        |
| Organic matter (%)    | 3.20          |
| Potassium (mg/kg)     | 399.00        |
| Iron (mg/kg)          | 2.00          |
| Clay (%)              | 22.20         |
| Sand (%)              | 68.30         |
| Silt (%)              | 7.92          |
